## 1            **Doxycycline has Distinct Apicoplast-Specific Mechanisms of Antimalarial Activity**

2  
3            Megan Okada<sup>a</sup>, Ping Guo<sup>a</sup>, Shai-anne Nalder<sup>a</sup>, and Paul A. Sigala<sup>a,1</sup>

4  
5  
6            <sup>a</sup>Department of Biochemistry, University of Utah School of Medicine, Salt Lake City, UT 84112

7  
8            <sup>1</sup>To whom correspondence may be addressed: [p.sigala@biochem.utah.edu](mailto:p.sigala@biochem.utah.edu)

9  
10          ORCID ID:

11          (M.O.) 0000-0003-4398-9819

12          (P.G.) 0000-0003-3023-779X

13          (S.N.) 0000-0002-6892-9321

14          (P.A.S.) 0000-0002-3464-3042

15  
16  
17          Author contributions: P.A.S. designed research; P.G., S.N., M.O., and P.A.S. performed research  
18          and analyzed data; P.A.S. wrote the paper.

19  
20          The authors declare no competing interests.

21  
22  
23  
24  
25  
26  
27  
28  
29  
30  
31  
32  
33  
34  
35  
36  
37  
38  
39  
40  
41  
42  
43  
44

45 **Abstract:** Doxycycline (DOX) is a key antimalarial drug thought to kill *Plasmodium* parasites by  
46 blocking protein translation in the essential apicoplast organelle. Clinical use is primarily limited  
47 to prophylaxis due to delayed second-cycle parasite death at 1-3  $\mu\text{M}$  serum concentrations. DOX  
48 concentrations  $>5 \mu\text{M}$  kill parasites with first-cycle activity but have been ascribed to off-target  
49 mechanisms outside the apicoplast. We report that 10  $\mu\text{M}$  DOX blocks apicoplast biogenesis in  
50 the first cycle and is rescued by isopentenyl pyrophosphate, an essential apicoplast product,  
51 confirming an apicoplast-specific mechanism. Exogenous iron rescues parasites and apicoplast  
52 biogenesis from first- but not second-cycle effects of 10  $\mu\text{M}$  DOX, revealing that first-cycle  
53 activity involves a metal-dependent mechanism distinct from the delayed-death mechanism. These  
54 results critically expand the paradigm for understanding the fundamental antiparasitic mechanisms  
55 of DOX and suggest repurposing DOX as a faster-acting antimalarial at higher dosing whose  
56 multiple mechanisms would be expected to limit parasite resistance.

57

58

59

60

61

62

63

64

65

66

67

## 68 INTRODUCTION

69 Malaria remains a serious global health problem, with hundreds of thousands of annual deaths due  
70 to *Plasmodium falciparum* parasites. The absence of a potent, long-lasting vaccine and parasite  
71 tolerance to frontline artemisinin combination therapies continue to challenge malaria elimination  
72 efforts. Furthermore, there are strong concerns that the current COVID-19 pandemic will disrupt  
73 malaria prevention and treatment efforts in Africa and cause a surge in malaria deaths that unravels  
74 decades of progress (1). Deeper understanding of basic parasite biology and the mechanisms of  
75 current drugs will guide their optimal use for malaria prevention and treatment and facilitate  
76 development of novel therapies to combat parasite drug resistance.

77 Tetracycline antibiotics like DOX are thought to kill eukaryotic *P. falciparum* parasites by  
78 inhibiting prokaryotic-like 70S ribosomal translation inside the essential apicoplast organelle  
79 (Figure 1) (2). Although stable *P. falciparum* resistance to DOX has not been reported, clinical use  
80 is largely limited to prophylaxis due to delayed activity against intraerythrocytic infection (3, 4).  
81 Parasites treated with 1-3  $\mu\text{M}$  DOX, the drug concentration sustained in human serum with current  
82 100-200 mg dosage (5), continue to grow for 72-96 hours and only die after the second 48-hour  
83 intraerythrocytic growth cycle when they fail to expand into a third cycle (2). Slow antiparasitic  
84 activity is believed to be a fundamental limitation of DOX and other antibiotics that block  
85 apicoplast-maintenance pathways (4, 6). First-cycle anti-*Plasmodium* activity has been reported  
86 for DOX and azithromycin concentrations  $>3 \mu\text{M}$ , but such activities have been ascribed to targets  
87 outside the apicoplast (2, 7, 8). A more incisive understanding of the mechanisms and parameters  
88 that govern first versus second-cycle DOX activity can inform and improve clinical use of this  
89 valuable antibiotic for antimalarial treatment. We therefore set out to test and unravel the  
90 mechanisms and apicoplast specificity of first-cycle DOX activity.

## 91 RESULTS AND DISCUSSION

92 **First-cycle activity by 10  $\mu$ M DOX has an apicoplast-specific mechanism.** Prior studies have  
93 shown that 200  $\mu$ M isopentenyl pyrophosphate (IPP), an essential apicoplast product, rescues  
94 parasites from the delayed-death activity of 1-3  $\mu$ M DOX, confirming an apicoplast-specific target  
95 (7). To provide a baseline for comparison, we first used continuous-growth and 48-hour growth-  
96 inhibition assays to confirm that IPP rescued parasites from 1  $\mu$ M DOX (Figure 2A) and that DOX  
97 concentrations  $>5$   $\mu$ M killed parasites with first-cycle activity (Figure 2A – C and Figure 2- figure  
98 supplement 1) as previously reported (2). To test the apicoplast specificity of first-cycle DOX  
99 activity, we next asked whether 200  $\mu$ M IPP could rescue parasites from DOX concentrations  $>5$   
100  $\mu$ M. We observed that IPP shifted the 48-hour  $EC_{50}$  value of DOX from  $5 \pm 1$  to  $12 \pm 2$   $\mu$ M  
101 (average  $\pm$  SD of 5 independent assays,  $P = 0.001$  by unpaired t-test) (Figure 2C and Figure 2-  
102 figure supplement 1), suggesting that first-cycle growth defects from 5-10  $\mu$ M DOX reflect an  
103 apicoplast-specific mechanism but that DOX concentrations  $>10$   $\mu$ M cause off-target defects  
104 outside this organelle. We further tested this conclusion using continuous growth assays performed  
105 at constant DOX concentrations. We observed that IPP fully or nearly fully rescued parasites from  
106 first-cycle growth inhibition by 10  $\mu$ M but not 20 or 40  $\mu$ M Dox (Figure 2A & 2D and Figure 2-  
107 figure supplement 1). On the basis of IPP rescue, we conclude that 10  $\mu$ M DOX kills *P. falciparum*  
108 with first-cycle activity by an apicoplast-specific mechanism.

109

110 **10  $\mu$ M DOX blocks apicoplast biogenesis in the first cycle:** Inhibition of apicoplast biogenesis  
111 in the second intraerythrocytic cycle is a hallmark of 1-3  $\mu$ M DOX-treated *P. falciparum*, resulting  
112 in unviable parasite progeny that fail to inherit the organelle (2). IPP rescues parasite viability after  
113 the second cycle without rescuing apicoplast inheritance, such that third-cycle daughter parasites

114 lack the organelle and accumulate apicoplast-targeted proteins in cytoplasmic vesicles (7). We  
115 treated synchronized ring-stage D10 (9) or NF54 (10) parasites expressing the acyl carrier protein  
116 leader sequence fused to GFP (ACP<sub>L</sub>-GFP) with 10  $\mu$ M DOX and assessed apicoplast morphology  
117 30-36 hours later in first-cycle schizonts. In contrast to the second-cycle effects of 1-3  $\mu$ M DOX,  
118 the apicoplast in 10  $\mu$ M DOX-treated parasites failed to elongate in the first cycle. Rescue by 200  
119  $\mu$ M IPP produced second-cycle parasite progeny with a dispersed GFP signal indicative of  
120 apicoplast loss (Figure 2E and Figure 2- figure supplement 2). We conclude that 10  $\mu$ M DOX  
121 blocks apicoplast biogenesis in the first cycle.

122

123 **First- and second-cycle effects of DOX on the apicoplast are due to distinct mechanisms.**

124 What is the molecular mechanism of faster apicoplast-specific activity by 10  $\mu$ M DOX? We first  
125 considered the model that both 1 and 10  $\mu$ M DOX inhibit apicoplast translation but that 10  $\mu$ M  
126 DOX kills parasites faster due to more stringent translation inhibition at higher drug  
127 concentrations. This model predicts that treating parasites simultaneously with multiple distinct  
128 apicoplast-translation inhibitors, each added at a delayed death-inducing concentration, will  
129 produce additive, accelerated activity that kills parasites in the first cycle. To test this model, we  
130 treated synchronized D10 parasites with combinatorial doses of 2  $\mu$ M DOX, 2  $\mu$ M clindamycin,  
131 and 500 nM azithromycin and monitored growth over 3 intraerythrocytic cycles. Treatment with  
132 each antibiotic alone produced major growth defects at the end of the second cycle, as expected  
133 for delayed-death activity at these concentrations (6). Two- and three-way drug combinations  
134 caused growth defects that were indistinguishable from individual treatments and provided no  
135 evidence for additive, first-cycle activity (Figure 3A and Figure 3- figure supplement 1). These

136 results contradict a simple model that 1 and 10  $\mu\text{M}$  DOX act via a common translation-blocking  
137 mechanism and suggest that the first-cycle activity of 10  $\mu\text{M}$  DOX is due to a distinct mechanism.

138

139 **Exogenous iron rescues parasites from first- but not second-cycle effects of 10  $\mu\text{M}$  DOX.**

140 Tetracycline antibiotics like DOX tightly chelate a wide variety of di- and trivalent metal ions via  
141 their siderophore-like arrangement of exocyclic hydroxyl and carbonyl groups (Figure 1), with a  
142 reported affinity series of  $\text{Fe}^{3+} > \text{Fe}^{2+} > \text{Zn}^{2+} > \text{Mg}^{2+} > \text{Ca}^{2+}$  (11, 12). Indeed, tetracycline interactions  
143 with  $\text{Ca}^{2+}$  and  $\text{Mg}^{2+}$  ions mediate cellular uptake and binding to biomolecular targets such as the  
144 tetracycline repressor and 16S rRNA (12, 13). We next considered a model that first-cycle effects  
145 of 10  $\mu\text{M}$  DOX reflect a metal-dependent mechanism distinct from ribosomal inhibition causing  
146 second-cycle death. To test this model, we investigated whether exogenous metals rescued  
147 parasites from 10  $\mu\text{M}$  DOX. We failed to observe growth rescue by 10  $\mu\text{M}$   $\text{ZnCl}_2$  (toxicity limit  
148 (14)) or 500  $\mu\text{M}$   $\text{CaCl}_2$  in continuous-growth (Figure 3B and Figure 3- figure supplement 1) or 48-  
149 hour growth-inhibition assays (Figure 3C). In contrast, 500  $\mu\text{M}$   $\text{FeCl}_3$  (and to a lesser extent 500  
150  $\mu\text{M}$   $\text{MgCl}_2$ ) fully or nearly fully rescued parasites from first-cycle growth inhibition by 10  $\mu\text{M}$   
151 DOX (Figure 3C & 3D), although partial rescue was observed at  $\text{FeCl}_3$  concentrations as low as  
152 50  $\mu\text{M}$  (Figure 3- figure supplement 1). However, parasites treated with 10  $\mu\text{M}$  DOX and 500  $\mu\text{M}$   
153  $\text{FeCl}_3$  still succumbed to second-cycle, delayed death (Figure 3D and Figure 3- figure supplement  
154 1), as expected for distinct mechanisms of first- and second-cycle DOX activity.

155 We also observed that 500  $\mu\text{M}$   $\text{FeCl}_3$  but not  $\text{CaCl}_2$  rescued first-cycle apicoplast-  
156 branching in 10  $\mu\text{M}$  DOX (Figure 3E and Figure 3- figure supplement 2). These observations  
157 contrast with IPP, which rescued parasite viability in 10  $\mu\text{M}$  DOX but did not restore apicoplast  
158 branching (Figure 2E). We further noted that  $\text{FeCl}_3$  selectively rescued parasites from the

159 apicoplast-specific, first-cycle growth effects of 10  $\mu\text{M}$  DOX but did not rescue parasites from the  
160 second-cycle effects of 1  $\mu\text{M}$  DOX (Figures 3F) or the off-target effects of 20-40  $\mu\text{M}$  DOX (Figure  
161 3G and Figure 3- figure supplement 1). We conclude that 10  $\mu\text{M}$  DOX kills parasites via a metal-  
162 dependent, first-cycle mechanism that blocks apicoplast biogenesis and is distinct from the second-  
163 cycle, delayed-death mechanism of 1  $\mu\text{M}$  DOX.

164

165 **Metal-dependent mechanisms of first-cycle activity by 10  $\mu\text{M}$  DOX.** What is the metal-  
166 dependent mechanism of 10  $\mu\text{M}$  DOX, and why is there preferential rescue by  $\text{FeCl}_3$ ?  
167 Tetracyclines bind iron more tightly than other metals, with an equilibrium association constant of  
168  $10^{10} \text{ M}^{-1}$  for 1:1 chelation of  $\text{Fe}^{3+}$  versus  $10^4 \text{ M}^{-1}$  for  $\text{Mg}^{2+}$  (11). Although the 500  $\mu\text{M}$  concentration  
169 of exogenous  $\text{FeCl}_3$  required for maximal rescue of parasite growth in 10  $\mu\text{M}$  DOX is large relative  
170 to the  $\sim 1 \mu\text{M}$  labile iron concentration estimated for the parasite cytoplasm (15), the intracellular  
171 iron concentration achieved by exogenous addition of 500  $\mu\text{M}$   $\text{FeCl}_3$  remains unclear. Indeed,  
172 mechanisms of iron uptake and trafficking by blood-stage *P. falciparum* remain sparsely  
173 understood (15, 16), especially uptake across the four membranes that surround the apicoplast.

174 We first considered whether exogenous  $\text{FeCl}_3$  might selectively rescue 10  $\mu\text{M}$  DOX  
175 activity by blocking or reducing its uptake into the parasite apicoplast, since metal chelation has  
176 been reported to influence the cellular uptake of tetracycline antibiotics in other organisms (12).  
177 However, 500  $\mu\text{M}$   $\text{FeCl}_3$  or  $\text{MgCl}_2$  did not rescue second-cycle parasite death in continuous growth  
178 assays with 10  $\mu\text{M}$  (Figures 3D) or 1  $\mu\text{M}$  DOX (Figure 3F). Furthermore, exogenous iron resulted  
179 in only a small, 1.5- $\mu\text{M}$  shift in  $\text{EC}_{50}$  value from 0.5 to 2  $\mu\text{M}$  in a 96-hour growth inhibition assay,  
180 in contrast to the 10.5- $\mu\text{M}$  shift provided by IPP (Figure 3- figure supplement 1). These results  
181 strongly suggest that DOX uptake into the apicoplast is not substantially perturbed by exogenous

182 iron. The inability of 500  $\mu\text{M}$   $\text{FeCl}_3$  to rescue first-cycle activity by  $\geq 20\text{-}\mu\text{M}$  DOX (Figure 3G)  
183 further suggests that general uptake of DOX into parasites is not substantially affected by  
184 exogenous iron.

185 We propose two distinct models to explain the metal-dependent effects of 10  $\mu\text{M}$  DOX,  
186 both of which could contribute to apicoplast-specific activity. First, DOX could directly bind and  
187 sequester labile iron within the apicoplast, reducing its bioavailability for Fe-S cluster biogenesis  
188 and other essential iron-dependent processes in this organelle. Indeed, prior work has shown that  
189 apicoplast biogenesis requires Fe-S cluster synthesis apart from known essential roles in  
190 isoprenoid biosynthesis (17). In this first model, rescue by exogenous  $\text{FeCl}_3$  would be due to  
191 restoration of iron bioavailability, while modest rescue by 500  $\mu\text{M}$   $\text{MgCl}_2$  may reflect competitive  
192 displacement of DOX-bound iron to restore iron bioavailability. RPMI growth medium already  
193 contains  $\sim 400\ \mu\text{M}$   $\text{Mg}^{2+}$  prior to supplementation with an addition 500  $\mu\text{M}$   $\text{MgCl}_2$ , and thus  $\text{Mg}^{2+}$   
194 availability is unlikely to be directly limited by 10  $\mu\text{M}$  DOX. Consistent with a general mechanism  
195 that labile-iron chelation can block apicoplast biogenesis, we observed in preliminary studies that  
196 the anti-*Plasmodium* growth inhibition caused by the highly-specific iron chelator, deferoxamine  
197 (DFO) (16), could be partially rescued by IPP, fully rescued by exogenous  $\text{FeCl}_3$ , and involved a  
198 first-cycle defect in apicoplast branching/division (Figure 3- figure supplement 3). Development  
199 of targeted and incisive probes of labile iron within subcellular compartments remains an ongoing  
200 challenge in biology (18), especially in the *Plasmodium* apicoplast where iron uptake,  
201 concentration, and utilization remain sparsely understood. To evaluate the impact of DOX on iron  
202 availability in the apicoplast, we are developing protein-based probes of lipoic acid and isoprenoid  
203 biosynthesis, as these two apicoplast-dependent processes require Fe/S-cluster biosynthesis for  
204 activity (17).



205 In a second model, DOX could bind to additional macromolecular targets within the  
206 apicoplast (e.g., a metalloenzyme) via metal-dependent interactions that inhibit essential functions  
207 required for organelle biogenesis. Exogenous 500  $\mu\text{M}$   $\text{Fe}^{3+}$  would then rescue parasites by  
208 disrupting these inhibitory interactions via competitive binding to DOX. This second model would  
209 be mechanistically akin to diketo acid inhibitors of HIV integrase like raltegravir that bind to active  
210 site  $\text{Mg}^{2+}$  ions to inhibit integrase activity but are displaced by exogenous metals (19, 20). To test  
211 this model, we are developing a DOX-affinity reagent to identify apicoplast targets that interact  
212 with doxycycline and whose inhibition may contribute to first-cycle DOX activity.

213

214 **Conclusions and implications.** These results critically expand the paradigm for understanding the  
215 fundamental mechanisms of DOX activity against *P. falciparum* malaria parasites. These  
216 mechanisms include a delayed, second-cycle defect at 1-3  $\mu\text{M}$  DOX that likely reflects inhibition  
217 of 70S apicoplast ribosomes, a first-cycle iron-dependent defect within the apicoplast that uniquely  
218 operates at 8-10  $\mu\text{M}$  DOX, and a first-cycle iron-independent mechanism outside the apicoplast at  
219  $\geq 20$   $\mu\text{M}$  DOX (Figure 1). Pharmacokinetic studies indicate that current 100-200 mg doses of DOX  
220 achieve peak human serum concentrations of 6-8  $\mu\text{M}$  over the first six hours which then decrease  
221 to 1-2  $\mu\text{M}$  over 24 hours (5). Although current DOX treatment regimens result in delayed parasite  
222 clearance in vivo, both apicoplast-specific mechanisms of DOX likely operate over this  
223 concentration range and contribute to parasite death (2). These multiple mechanisms of DOX,  
224 together with limited antimalarial use of DOX in the field, may explain why parasites with stable  
225 DOX resistance have not emerged (3, 4).

226 There has been a prevailing view in the literature that delayed-death activity is a  
227 fundamental limitation of antibiotics like DOX that block apicoplast maintenance (21, 22). Our

228 results emphasize that DOX is not an intrinsically slow-acting antimalarial drug and support the  
229 emerging paradigm (23-25) that inhibition of apicoplast biogenesis can defy the delayed-death  
230 phenotype to kill parasites on a faster time-scale. The first-cycle, iron-dependent impacts of 10  
231  $\mu\text{M}$  DOX or 15  $\mu\text{M}$  DFO on apicoplast biogenesis also suggest that this organelle may be  
232 especially susceptible to therapeutic strategies that interfere with acquisition and utilization of iron,  
233 perhaps due to limited uptake of exogenous iron and/or limited iron storage mechanisms in the  
234 apicoplast.

235 Finally, this work suggests the possibility of repurposing DOX as a faster-acting  
236 antiparasitic treatment at higher dosing, whose multiple mechanisms would be expected to limit  
237 parasite resistance. Prior studies indicate that 500-600 mg doses in humans achieve sustained  
238 serum DOX concentrations  $\geq 5 \mu\text{M}$  for 24-48 hours with little or no increase in adverse effects (26,  
239 27). DOX is currently contraindicated for long-term prophylaxis in pregnant women and young  
240 children, two of the major at-risk populations for malaria, due to concerns about impacts on fetal  
241 development and infant tooth discoloration, respectively, based on observed toxicities for other  
242 tetracyclines (28). Recent studies suggest that these effects are not associated with short-term DOX  
243 use (28, 29), but more work is needed to define the safety parameters that would govern short-term  
244 use of DOX for treatment in these populations. Recent development of tetracycline derivatives  
245 with improved activities may provide another option to deploy this important class of antibiotics  
246 for antimalarial treatment (30).

247

248

249

250

251 **METHODS**

252 **Materials:** All reagents were cell-culture grade and/or of the highest purity commercially  
253 available. The vendor and catalog number are given for individual compounds when first  
254 mentioned.

255

256 **Parasite culture:** All experiments were performed using *Plasmodium falciparum* Dd2, ACP<sub>L</sub>-  
257 GFP D10 (9), or ACP<sub>L</sub>-GFP NF54 (10) parasite strains. Parasite culturing was performed as  
258 previously described (31) in Roswell Park Memorial Institute medium (RPMI-1640, Thermo  
259 Fisher 23400021) supplemented with 2.5 g/L Albumax I Lipid-Rich BSA (Thermo Fisher  
260 11020039), 15 mg/L hypoxanthine (Sigma H9636), 110 mg/L sodium pyruvate (Sigma P5280),  
261 1.19 g/L HEPES (Sigma H4034), 2.52 g/L sodium bicarbonate (Sigma S5761), 2 g/L glucose  
262 (Sigma G7021), and 10 mg/L gentamicin (Invitrogen Life Technologies 15750060). Cultures were  
263 maintained at 2% hematocrit in human erythrocytes obtained from the University of Utah Hospital  
264 blood bank, at 37 °C, and at 5% O<sub>2</sub>, 5% CO<sub>2</sub>, 90% N<sub>2</sub>.

265

266 **Parasite Growth Assays:** Parasites were synchronized to the ring stage either by treatment with  
267 5% D-sorbitol (Sigma S7900) or by first magnet-purifying schizonts and then incubating them  
268 with uninfected erythrocytes for five hours followed by treatment with 5% D-sorbitol. Results  
269 from growth assays using either of these synchronization methods were indistinguishable, and 5%  
270 sorbitol was used for synchronization unless stated otherwise. For continuous growth assays,  
271 parasite growth was monitored by diluting sorbitol-synchronized parasites to ~0.5% starting  
272 parasitemia, adding additional treatments (antibiotics, IPP, and/or metal salts) at assay initiation,  
273 and allowing culture expansion over several days with daily media changes. Growth assays with

274 doxycycline (Sigma D3447), clindamycin (Sigma C6427), and azithromycin (Sigma 75199) were  
275 conducted at 0.2% DMSO at the indicated final drug concentration. Growth assays with ZnCl<sub>2</sub>  
276 (Sigma 208086), CaCl<sub>2</sub> (Sigma C4901), MgCl<sub>2</sub> (M8266), FeCl<sub>3</sub> (Sigma 236489), deferoxamine  
277 (Sigma D9533), and/or IPP (NH<sub>4</sub><sup>+</sup> salt, Isoprenoids IPP001) were conducted at the indicated final  
278 concentrations. Parasitemia was monitored daily by flow cytometry by diluting 10 µl of each  
279 parasite culture well from 2-3 biological replicates into 200µl of 1.0 µg/ml acridine orange  
280 (Invitrogen Life Technologies A3568) in phosphate buffered saline (PBS) and analysis on a BD  
281 FACSCelesta system monitoring SSC-A, FSC-A, PE-A, FITC-A, and PerCP-Cy5-5-A channels.  
282 For EC<sub>50</sub> determinations via dose-response assay, synchronous ring-stage parasites were diluted  
283 to 1% parasitemia and incubated with variable (serially two-fold diluted) DOX concentrations  
284 ±200 µM IPP, ±50 µM mevalonate (Cayman 20348), ±500 µM FeCl<sub>3</sub>, or ±500 µM CaCl<sub>2</sub> for 48-  
285 120 hours without media changes. Parasitemia was determined by flow cytometry for 2-4  
286 biological replicates for each untreated or drug-treated condition, normalized to the parasitemia in  
287 the absence of drug, plotted as the average ±SD of biological replicates as a function of the log of  
288 the drug concentration (in µM), and fit to a 4-parameter dose-response model using GraphPad  
289 Prism 8.0. All growth assays were independently repeated 2-4 times on different weeks and in  
290 different batches of blood. The 48-hour EC<sub>50</sub> values determined from five independent assays for  
291 DOX ±IPP were averaged and analyzed by unpaired t-test using GraphPad Prism 8.0.

292

293 **Fluorescence Microscopy:** For live-cell experiments, parasites samples were collected at 30-36  
294 or 65 hours after synchronization with magnet purification plus sorbitol treatment (see above).  
295 Imaging experiments were independently repeated twice. Parasite nuclei were visualized by  
296 incubating samples with 1-2 µg/ml Hoechst 33342 (Thermo Scientific Pierce 62249) for 10-20

297 minutes at room temperature. The parasite apicoplast was visualized in D10 (9) or NF54  
298 mevalonate-bypass (10) cells using the ACP<sub>leader</sub>-GFP expressed by both lines. Images were taken  
299 on DIC/brightfield, DAPI, and GFP channels using either a Zeiss Axio Imager or an EVOS M5000  
300 imaging system. Fiji/ImageJ was used to process and analyze images. All image adjustments,  
301 including contrast and brightness, were made on a linear scale. For indicated conditions, apicoplast  
302 morphologies in 20-40 parasites were scored as elongated, focal, or dispersed; counted; and plotted  
303 by histogram as the fractional population with the indicated morphology. Analysis of replicate  
304 samples indicated standard deviations that were <10% for all samples in the percentage of  
305 parasites displaying a given apicoplast morphology in a given condition. Unpaired t-test analysis  
306 using GraphPad Prism was used to evaluate the significance of observed population differences.

307

308 **ACKNOWLEDGEMENTS.** We thank Jeremy Burrows, Dan Goldberg, Don Granger, Daria  
309 Hazuda, Jerry Kaplan, Sean Prigge, Dennis Winge and members of the Sigala lab for helpful  
310 discussions. P.A.S. holds a Career Award at the Scientific Interface from the Burroughs Wellcome  
311 Fund and a Pew Biomedical Scholarship from the Pew Charitable Trusts. Microscopy and flow  
312 cytometry were performed using core facilities at the University of Utah.

313

#### 314 **References:**

- 315 1. Weiss DJ, *et al.* (2020) Indirect effects of the COVID-19 pandemic on malaria intervention  
316 coverage, morbidity, and mortality in Africa: a geospatial modelling analysis. *Lancet Infect.*  
317 *Dis.* [http://dx.doi.org/10.1016/S1473-3099\(20\)30700-3](http://dx.doi.org/10.1016/S1473-3099(20)30700-3).  
318 2. Dahl EL, *et al.* (2006) Tetracyclines specifically target the apicoplast of the malaria parasite  
319 *Plasmodium falciparum*. *Antimicrob. Agents Chemother.* 50(9):3124-3131.  
320 <http://dx.doi.org/10.1128/AAC.00394-06>.  
321 3. Conrad MD & Rosenthal PJ (2019) Antimalarial drug resistance in Africa: the calm before  
322 the storm? *Lancet Infect. Dis.* 19(10):e338-e351. [http://dx.doi.org/10.1016/S1473-](http://dx.doi.org/10.1016/S1473-3099(19)30261-0)  
323 [3099\(19\)30261-0](http://dx.doi.org/10.1016/S1473-3099(19)30261-0).

- 324 4. Gaillard T, Madamet M, & Pradines B (2015) Tetracyclines in malaria. *Malar. J.* 14:445.  
325 <http://dx.doi.org/10.1186/s12936-015-0980-0>.
- 326 5. Newton PN, *et al.* (2005) Pharmacokinetics of oral doxycycline during combination  
327 treatment of severe falciparum malaria. *Antimicrob. Agents Chemother.* 49(4):1622-1625.  
328 <http://dx.doi.org/10.1128/AAC.49.4.1622-1625.2005>.
- 329 6. Dahl EL & Rosenthal PJ (2007) Multiple antibiotics exert delayed effects against the  
330 *Plasmodium falciparum* apicoplast. *Antimicrob. Agents Chemother.* 51(10):3485-3490.  
331 <http://dx.doi.org/10.1128/AAC.00527-07>.
- 332 7. Yeh E & DeRisi JL (2011) Chemical rescue of malaria parasites lacking an apicoplast  
333 defines organelle function in blood-stage *Plasmodium falciparum*. *PLoS Biol.*  
334 9(8):e1001138. <http://dx.doi.org/10.1371/journal.pbio.1001138>.
- 335 8. Wilson DW, *et al.* (2015) Macrolides rapidly inhibit red blood cell invasion by the human  
336 malaria parasite, *Plasmodium falciparum*. *BMC Biol.* 13:52.  
337 <http://dx.doi.org/10.1186/s12915-015-0162-0>.
- 338 9. Waller RF, Reed MB, Cowman AF, & McFadden GI (2000) Protein trafficking to the plastid  
339 of *Plasmodium falciparum* is via the secretory pathway. *EMBO J.* 19(8):1794-1802.  
340 <http://dx.doi.org/10.1093/emboj/19.8.1794>.
- 341 10. Swift RP, *et al.* (2020) A mevalonate bypass system facilitates elucidation of plastid biology  
342 in malaria parasites. *PLoS Pathog.* 16(2):e1008316.  
343 <http://dx.doi.org/10.1371/journal.ppat.1008316>.
- 344 11. Albert A & Rees CW (1956) Avidity of the tetracyclines for the cations of metals. *Nature*  
345 177(4505):433-434. <http://dx.doi.org/10.1038/177433a0>.
- 346 12. Nelson ML (1998) Chemical and biological dynamics of tetracyclines. *Adv. Dent. Res.*  
347 12(2):5-11. <http://dx.doi.org/10.1177/08959374980120011901>.
- 348 13. Orth P, Schnappinger D, Hillen W, Saenger W, & Hinrichs W (2000) Structural basis of  
349 gene regulation by the tetracycline inducible Tet repressor-operator system. *Nat. Struct. Biol.*  
350 7(3):215-219. <http://dx.doi.org/10.1038/73324>.
- 351 14. Marvin RG, *et al.* (2012) Fluxes in "free" and total zinc are essential for progression of  
352 intraerythrocytic stages of *Plasmodium falciparum*. *Chem. Biol.* 19(6):731-741.  
353 <http://dx.doi.org/10.1016/j.chembiol.2012.04.013>.
- 354 15. Scholl PF, Tripathi AK, & Sullivan DJ (2005) Bioavailable iron and heme metabolism in  
355 *Plasmodium falciparum*. *Curr. Top. Microbiol. Immunol.* 295:293-324.
- 356 16. Mabeza GF, Loyevsky M, Gordeuk VR, & Weiss G (1999) Iron chelation therapy for  
357 malaria: a review. *Pharmacol. Ther.* 81(1):53-75. [http://dx.doi.org/10.1016/s0163-7258\(98\)00037-0](http://dx.doi.org/10.1016/s0163-7258(98)00037-0).
- 358
- 359 17. Gisselberg JE, Dellibovi-Ragheb TA, Matthews KA, Bosch G, & Prigge ST (2013) The suf  
360 iron-sulfur cluster synthesis pathway is required for apicoplast maintenance in malaria  
361 parasites. *PLoS Path.* 9(9):e1003655. <http://dx.doi.org/10.1371/journal.ppat.1003655>.
- 362 18. Breuer W, Shvartsman M, & Cabantchik ZI (2008) Intracellular labile iron. *Int. J. Biochem.*  
363 *Cell Biol.* 40(3):350-354. <http://dx.doi.org/10.1016/j.biocel.2007.03.010>.
- 364 19. Grobler JA, *et al.* (2002) Diketo acid inhibitor mechanism and HIV-1 integrase: implications  
365 for metal binding in the active site of phosphotransferase enzymes. *Proc. Natl. Acad. Sci.*  
366 *U.S.A.* 99(10):6661-6666. <http://dx.doi.org/10.1073/pnas.092056199>.
- 367 20. Hare S, Gupta SS, Valkov E, Engelman A, & Cherepanov P (2010) Retroviral intasome  
368 assembly and inhibition of DNA strand transfer. *Nature* 464(7286):232-236.  
369 <http://dx.doi.org/10.1038/nature08784>.

- 370 21. Ramya TN, Mishra S, Karmodiya K, Surolia N, & Surolia A (2007) Inhibitors of  
371 nonhousekeeping functions of the apicoplast defy delayed death in *Plasmodium falciparum*.  
372 *Antimicrob. Agents Chemother.* 51(1):307-316. <http://dx.doi.org/10.1128/AAC.00808-06>.  
373 22. Kennedy K, Crisafulli EM, & Ralph SA (2019) Delayed Death by Plastid Inhibition in  
374 Apicomplexan Parasites. *Trends Parasitol* 35(10):747-759.  
375 <http://dx.doi.org/10.1016/j.pt.2019.07.010>.  
376 23. Boucher MJ & Yeh E (2019) Disruption of Apicoplast Biogenesis by Chemical Stabilization  
377 of an Imported Protein Evades the Delayed-Death Phenotype in Malaria Parasites. *mSphere*  
378 4(1). <http://dx.doi.org/10.1128/mSphere.00710-18>.  
379 24. Amberg-Johnson K, *et al.* (2017) Small molecule inhibition of apicomplexan FtsH1 disrupts  
380 plastid biogenesis in human pathogens. *eLife* 6. <http://dx.doi.org/10.7554/eLife.29865>.  
381 25. Uddin T, McFadden GI, & Goodman CD (2018) Validation of Putative Apicoplast-  
382 Targeting Drugs Using a Chemical Supplementation Assay in Cultured Human Malaria  
383 Parasites. *Antimicrob. Agents Chemother.* 62(1). <http://dx.doi.org/10.1128/AAC.01161-17>.  
384 26. Marlin GE & Cheng S (1979) Pharmacokinetics and tolerability of a single oral 600-mg  
385 dose of doxycycline. *Med. J. Aust.* 1(12):575-576. [http://dx.doi.org/10.5694/j.1326-](http://dx.doi.org/10.5694/j.1326-5377.1979.tb142053.x)  
386 [5377.1979.tb142053.x](http://dx.doi.org/10.5694/j.1326-5377.1979.tb142053.x).  
387 27. Adadevoh BK, Ogunnaike IA, & Bolodeoku JO (1976) Serum levels of doxycycline in  
388 normal subjects after a single oral dose. *Br. Med. J.* 1(6014):880.  
389 <http://dx.doi.org/10.1136/bmj.1.6014.880>.  
390 28. Gaillard T, Boxberger M, Madamet M, & Pradines B (2018) Has doxycycline, in  
391 combination with anti-malarial drugs, a role to play in intermittent preventive treatment of  
392 *Plasmodium falciparum* malaria infection in pregnant women in Africa? *Malar. J.*  
393 17(1):469. <http://dx.doi.org/10.1186/s12936-018-2621-x>.  
394 29. Todd SR, *et al.* (2015) No visible dental staining in children treated with doxycycline for  
395 suspected Rocky Mountain Spotted Fever. *J Pediatr* 166(5):1246-1251.  
396 <http://dx.doi.org/10.1016/j.jpeds.2015.02.015>.  
397 30. Draper MP, *et al.* (2013) In vitro and in vivo antimalarial efficacies of optimized  
398 tetracyclines. *Antimicrob. Agents Chemother.* 57(7):3131-3136.  
399 <http://dx.doi.org/10.1128/AAC.00451-13>.  
400 31. Sigala PA, Crowley JR, Henderson JP, & Goldberg DE (2015) Deconvoluting heme  
401 biosynthesis to target blood-stage malaria parasites. *eLife* 4.  
402 <http://dx.doi.org/10.7554/eLife.09143>.

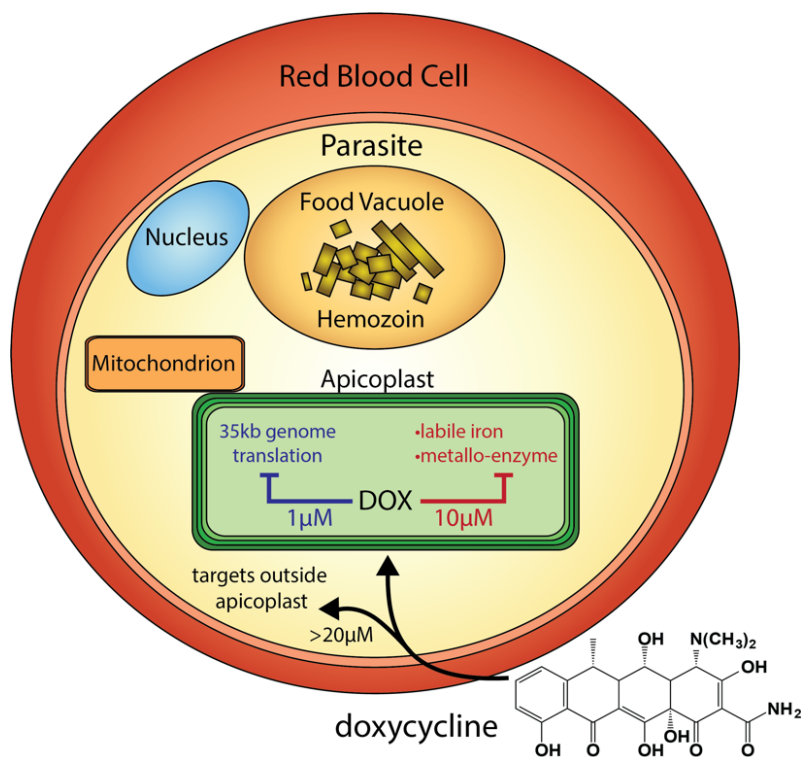

403

404 **Figure 1.** Scheme of intraerythrocytic *P. falciparum* parasite depicting doxycycline, its canonical  
405 delayed-death mechanism at 1  $\mu$ M inhibiting apicoplast genome translation, the novel metal-  
406 dependent mechanism(s) in the apicoplast explored herein at 10  $\mu$ M, and off-target activity outside  
407 the apicoplast at >20  $\mu$ M.

408

409

410

411

412

413

414

415



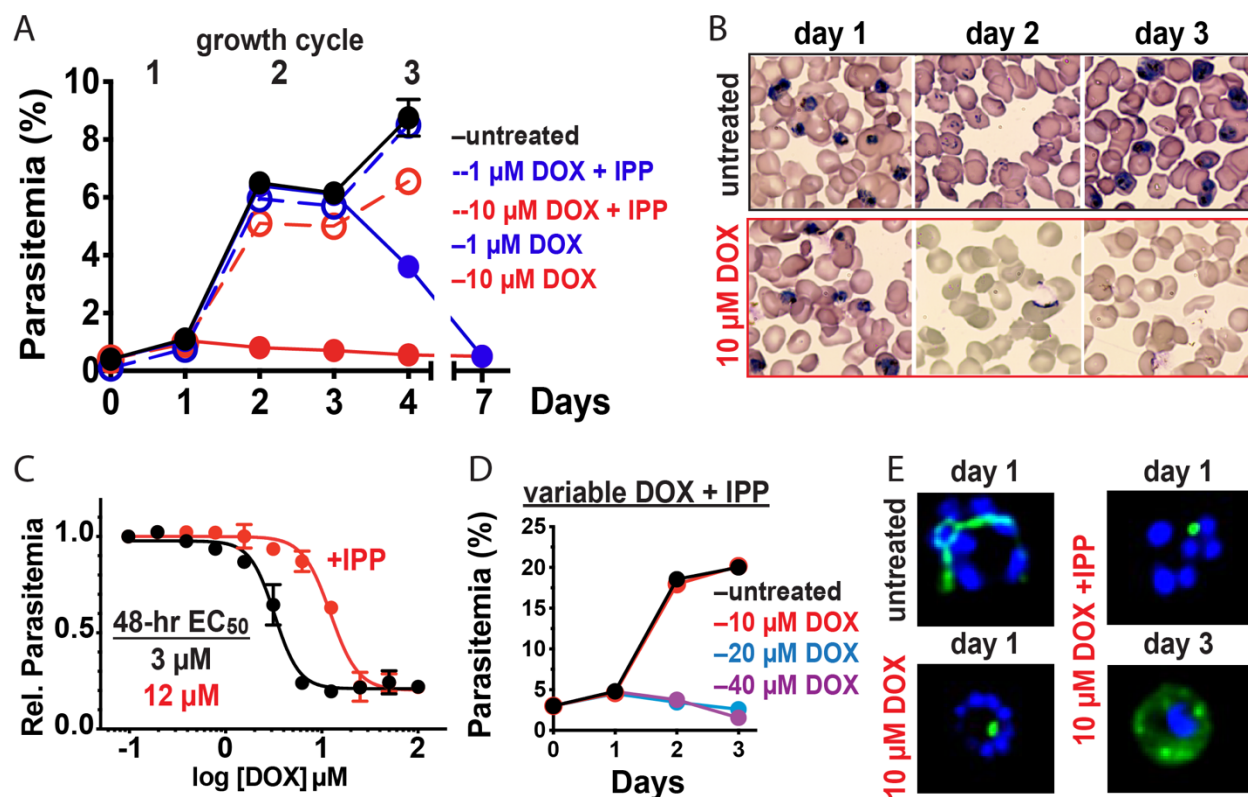

416

417 **Figure 2.** 10 μM doxycycline kills *P. falciparum* with first-cycle, apicoplast-specific activity. (A)  
 418 Continuous growth assay of synchronized Dd2 parasites treated with 1 or 10 μM DOX ±200 μM  
 419 IPP with (B) Giemsa-stained blood smears for days 1-3. (C) 48-hour growth-inhibition curve for  
 420 DOX-treated Dd2 parasites ±200 μM IPP. (D) Continuous growth assay of synchronized Dd2  
 421 parasites treated with 10 – 40 μM DOX and 200 μM IPP. (E) Epifluorescence images of  
 422 synchronized parasites treated as rings with 10 μM DOX ±200 μM IPP and imaged 36 or 65 hours  
 423 later (green = ACP<sub>L</sub>-GFP, blue = nuclear Hoechst stain). Data points in growth assays are the  
 424 average ±SD of biological replicates. All growth assays were independently repeated 2 – 4 times  
 425 using different batches of blood (shown in Figure 2- figure supplement 1).

426

427 The following figure supplements are available for figure 2:

428

429 **Figure supplement 1.** Additional, independent growth assays with DOX and IPP.

430

431 **Figure supplement 2.** Additional epifluorescence images of DOX-treated parasites and analysis.

432

433

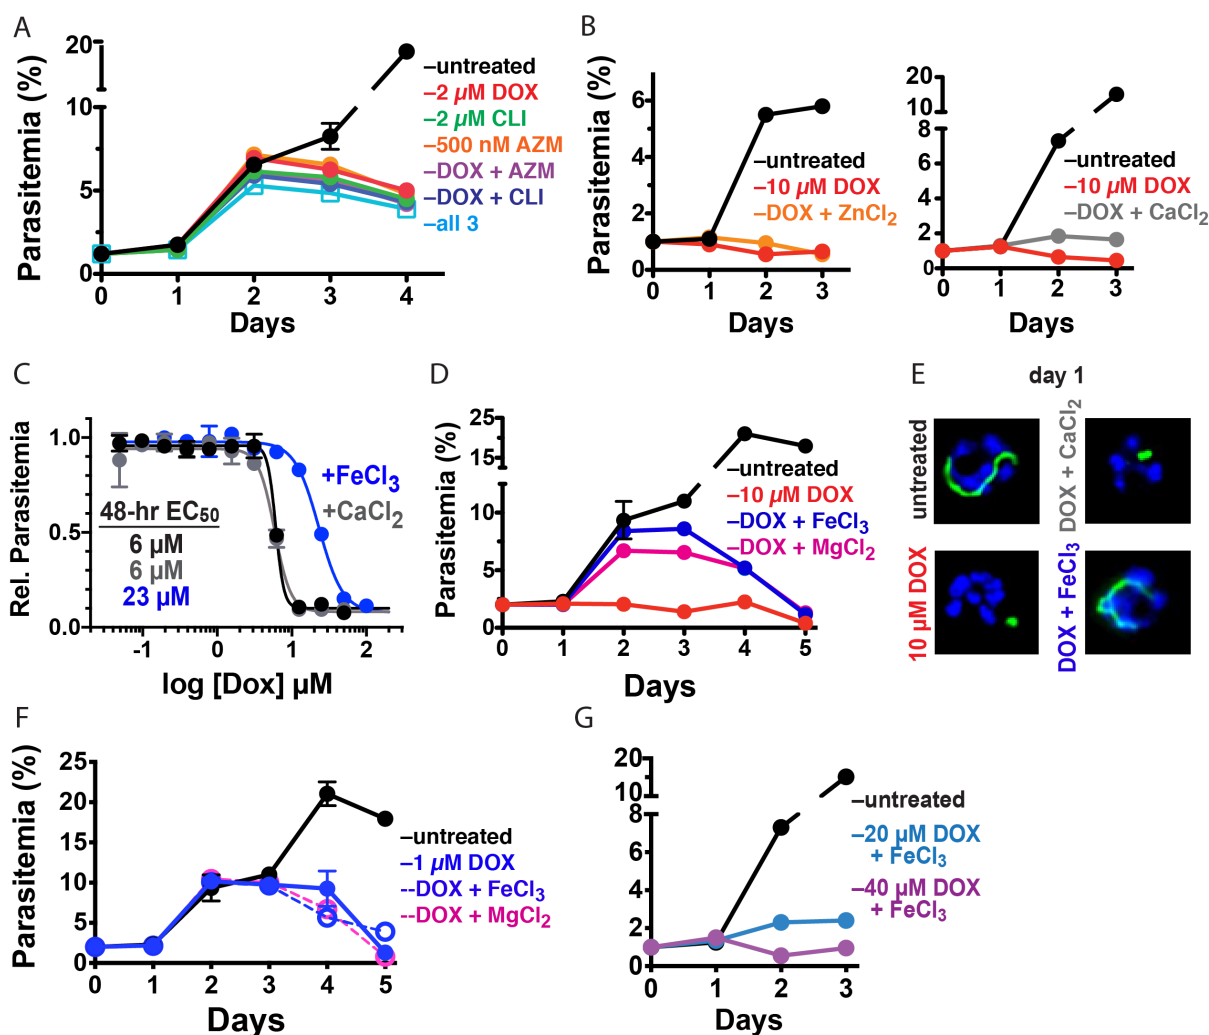

434  
 435 **Figure 3.** 10  $\mu$ M DOX kills *P. falciparum* with a first-cycle, metal-dependent mechanism.  
 436 Continuous growth assays of synchronized Dd2 parasites treated with (A) DOX, clindamycin  
 437 (CLI), and/or azithromycin (AZM) and (B) 10  $\mu$ M DOX and 10  $\mu$ M ZnCl<sub>2</sub> or 500  $\mu$ M CaCl<sub>2</sub>. (C)  
 438 48-hour growth inhibition assay of D10 parasites treated with DOX without or with 500  $\mu$ M FeCl<sub>3</sub>  
 439 or CaCl<sub>2</sub>. (D) Continuous growth assay of synchronized Dd2 parasites treated with 10  $\mu$ M DOX  
 440 and 500  $\mu$ M FeCl<sub>3</sub> or MgCl<sub>2</sub>. (E) Epifluorescence images of synchronized parasites treated as rings  
 441 with 10  $\mu$ M DOX  $\pm$  500  $\mu$ M FeCl<sub>3</sub> or CaCl<sub>2</sub> and imaged 36 hours later (green = ACP<sub>L</sub>-GFP, blue  
 442 = nuclear Hoechst stain). (F) Continuous growth assay of synchronized Dd2 parasites treated with  
 443 1  $\mu$ M DOX and 500  $\mu$ M FeCl<sub>3</sub> or MgCl<sub>2</sub>. (G) Continuous-growth assay of synchronized Dd2  
 444 parasites treated with 20 or 40  $\mu$ M DOX and 500  $\mu$ M FeCl<sub>3</sub>. Data points in growth assays are the  
 445 average  $\pm$ SD of biological replicates. All growth assays were independently repeated using  
 446 different batches of blood (shown in Figure 3- figure supplement 1).

447 The following figure supplements are available for figure 3:

448 **Figure supplement 1.** Additional independent growth assays with DOX, antibiotics, and metals.

449 **Figure supplement 2.** Additional images and analysis of parasites treated with DOX and metals.

450 **Figure supplement 3.** Effect of deferoxamine on parasite growth and apicoplast biogenesis.

451 **Supplemental Figures**

452

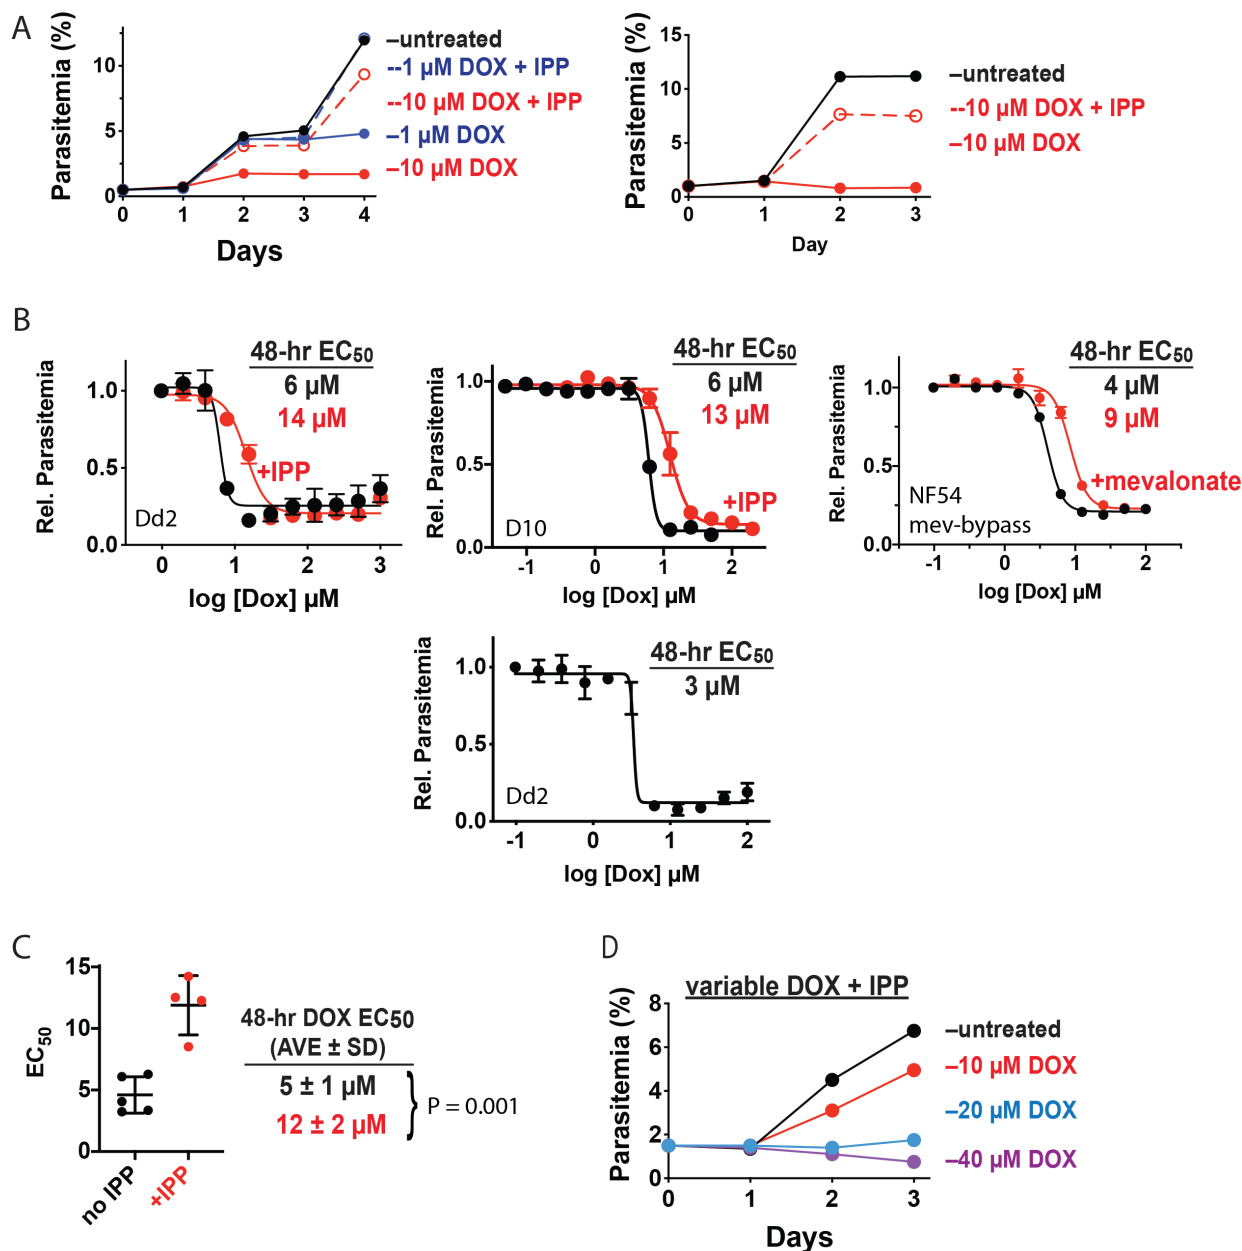

453 **Figure 2- figure supplement 1.** Additional, independent growth assays with DOX and IPP. (A)  
 454 Additional continuous growth assays of synchronized Dd2 parasites treated with 1 or 10 μM DOX  
 455 ±200 μM IPP. (B) Independent 48-hour growth-inhibition assays for DOX-treated Dd2, D10,  
 456 NF54 parasites in the absence or presence of 200 μM IPP or 50 μM mevalonate. Dd2 and NF54  
 457 parasites were synchronized by single treatment with 5% D-sorbitol. D10 parasites were  
 458 synchronized by magnet purification of schizonts followed by 5-hour incubation with uninfected  
 459 erythrocytes and treatment with 5% D-sorbitol. Data points in individual plots are the ave ±sd of  
 460 2-4 biological replicates. Each plot reflects an independent assay performed with a different batch  
 461 of blood. (C) Scatter plot of doxycycline EC<sub>50</sub> values from independent assays ±IPP with  
 462 calculated ave ± sd and analysis by unpaired t-test. (D) Independent continuous growth assay of  
 463 synchronized Dd2 parasites treated with 10 – 40 μM DOX and 200 μM IPP.  
 464

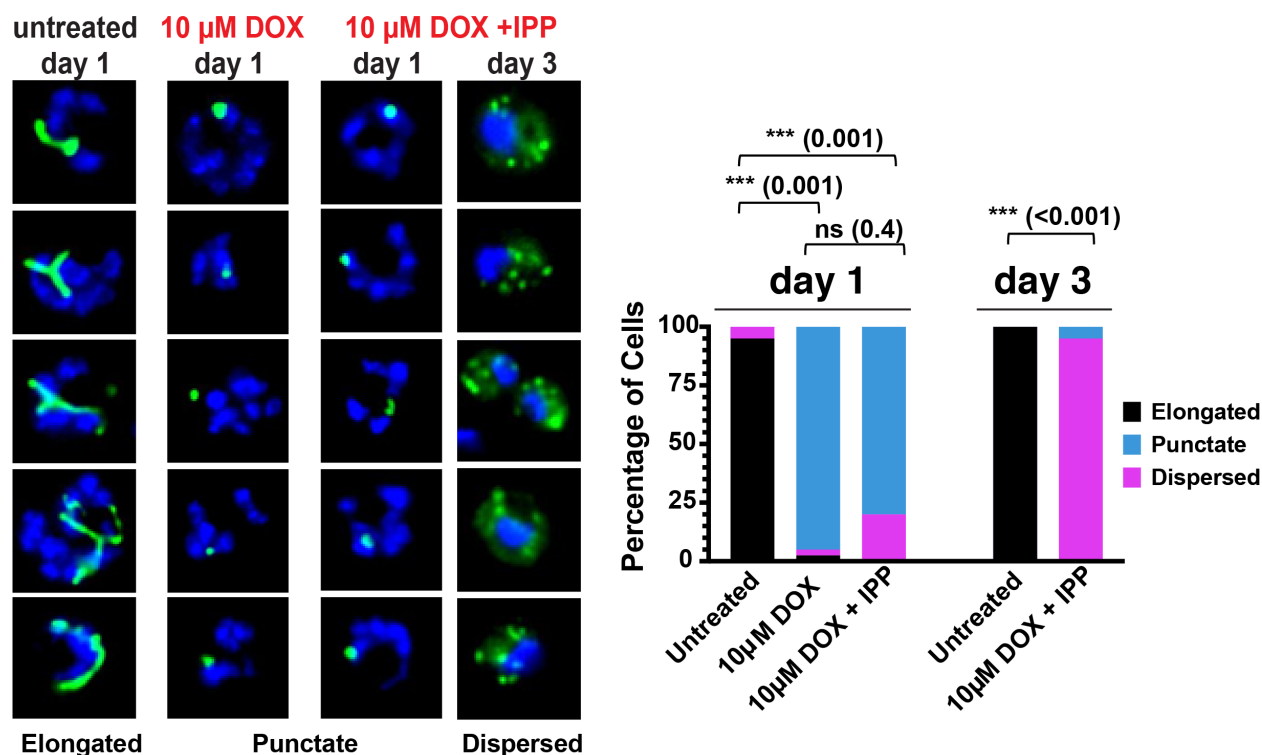

465  
466

467 **Figure 2- figure supplement 2.** Additional epifluorescence images of DOX-treated D10 parasites.  
468 Magnet plus sorbitol-synchronized parasites were treated as rings with 10 μM DOX ±200 μM IPP  
469 and imaged 1 or 3 days later (green = ACP<sub>L</sub>-GFP, blue = nuclear Hoechst stain). 20-40 parasites  
470 were examined for each treatment condition on each given day for duplicate experiments, and data  
471 were plotted as the average percentage of parasites in each population that displayed an elongated,  
472 punctate, or dispersed apicoplast GFP signal. For clarity, error bars are not displayed but standard  
473 deviations were <10% in all conditions. Cell-percentage differences were analyzed by unpaired t-  
474 test (P values in parentheses, ns = not significant).

475  
476  
477  
478  
479  
480  
481  
482  
483  
484  
485

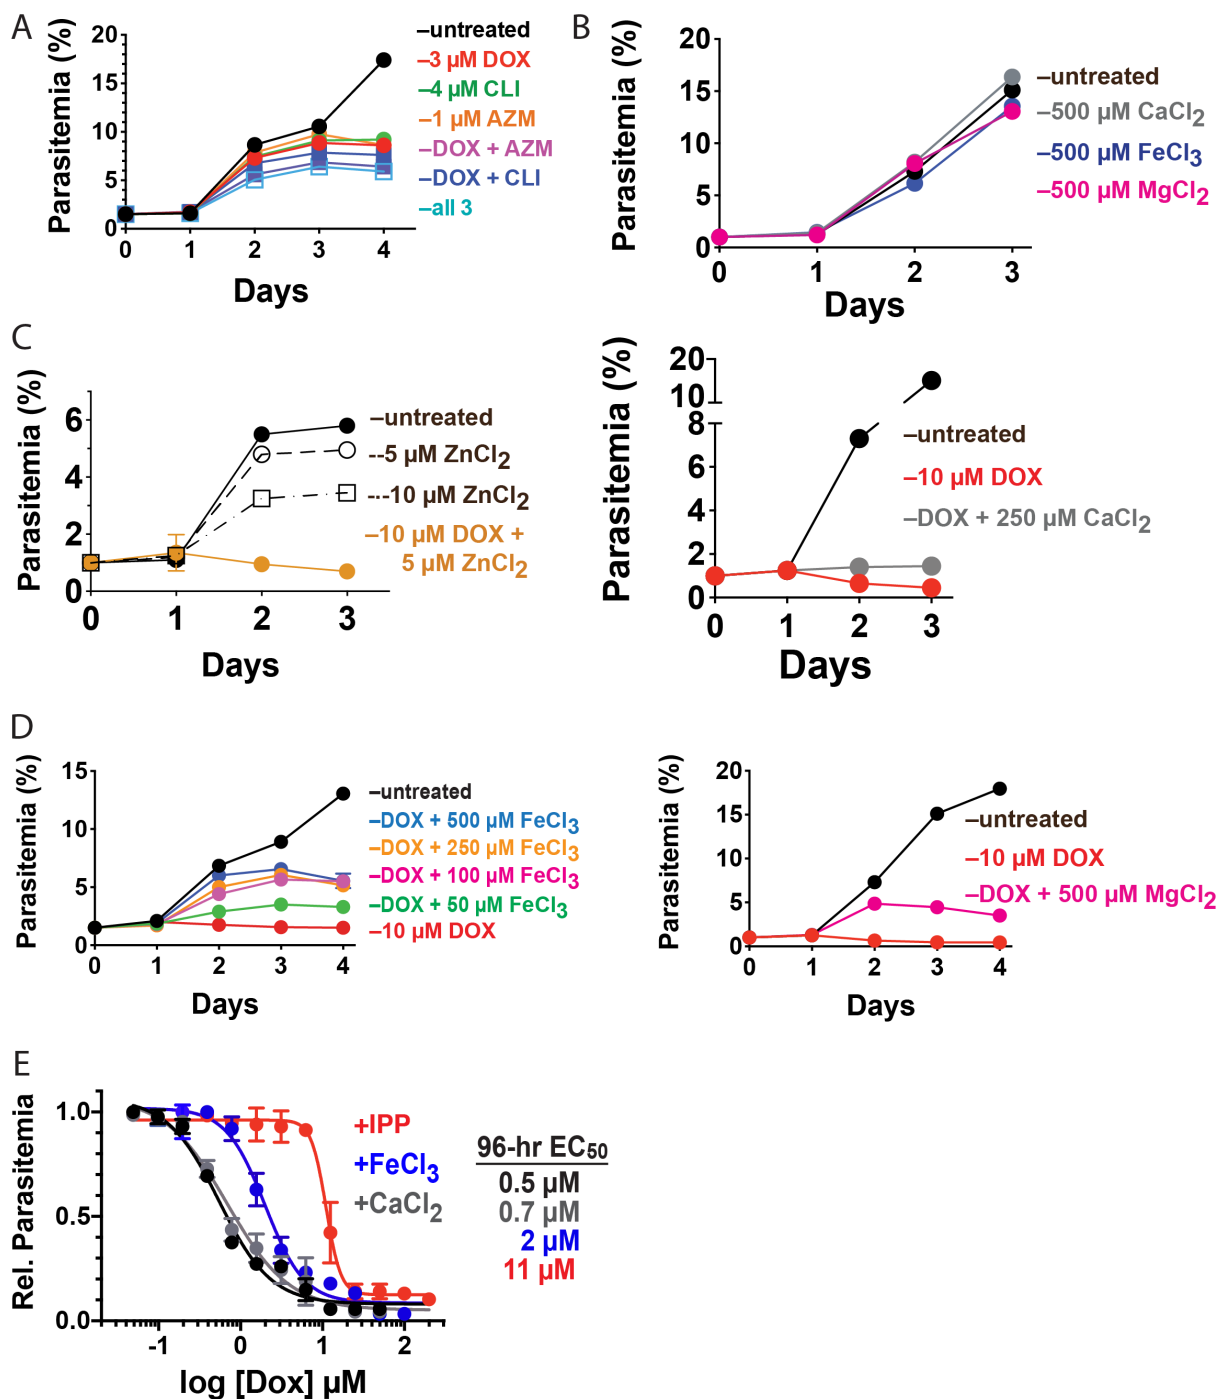

486  
 487 **Figure 3- figure supplement 1.** Additional, independent growth assays with DOX, other  
 488 antibiotics, and metals. Additional continuous growth assays of synchronized Dd2 parasites treated  
 489 with (A) DOX, clindamycin (CLI), and/or azithromycin (AZM); (B) 500  $\mu\text{M}$  of  $\text{CaCl}_2$ ,  $\text{MgCl}_2$ , or  
 490  $\text{FeCl}_3$  alone; (C) 10  $\mu\text{M}$  DOX and 5  $\mu\text{M}$   $\text{ZnCl}_2$  or 250  $\mu\text{M}$   $\text{CaCl}_2$ ; (D) 10  $\mu\text{M}$  DOX treated with  
 491 50 - 500  $\mu\text{M}$   $\text{FeCl}_3$  or 500  $\mu\text{M}$   $\text{MgCl}_2$ . Individual data points are the ave  $\pm$  sd from 2-4 biological  
 492 replicates. (E) 96-hour growth-inhibition assays for DOX-treated D10 parasites in the absence or  
 493 presence of 200  $\mu\text{M}$  IPP, 500  $\mu\text{M}$   $\text{FeCl}_3$ , or 500  $\mu\text{M}$   $\text{CaCl}_2$ . Parasites were synchronized by magnet  
 494 purification of schizonts followed by 5-hour incubation with uninfected erythrocytes and treatment  
 495 with 5% D-sorbitol. Data points are the ave  $\pm$ sd of 3 biological replicates.

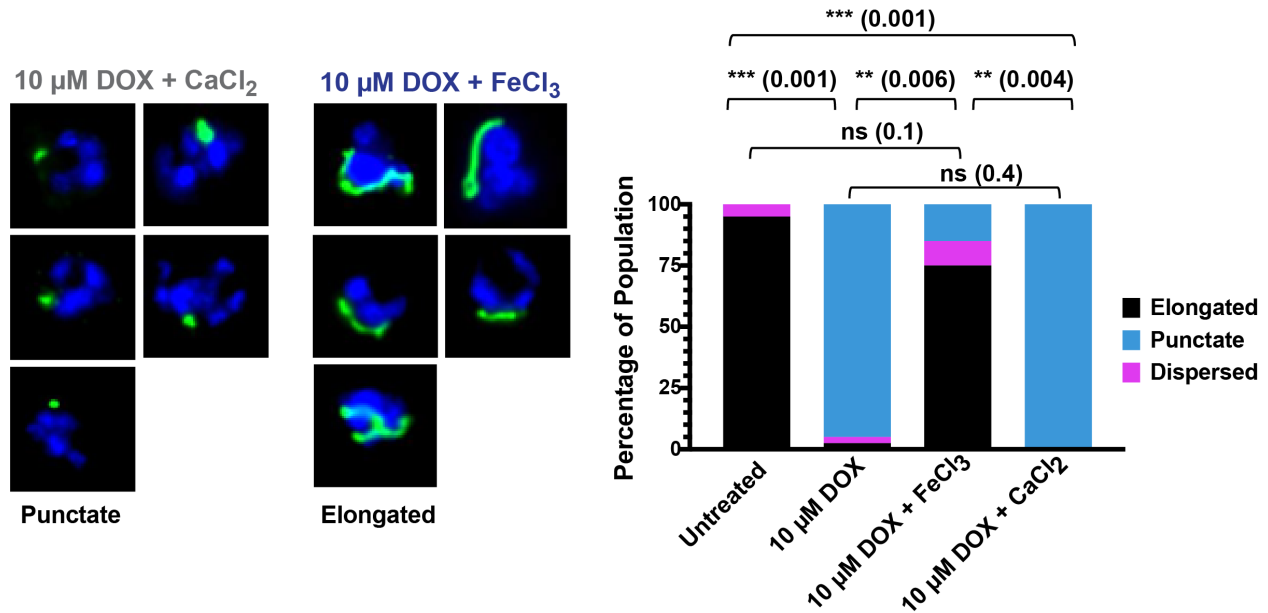

496  
497

498 **Figure 3- figure supplement 2.** Additional epifluorescence images of D10 parasites treated with  
499 DOX and metals. Magnet plus sorbitol-synchronized parasites were treated as rings with 10 μM  
500 DOX ±500 μM FeCl<sub>3</sub> or CaCl<sub>2</sub> and imaged 36 hours later (green = ACP<sub>L</sub>-GFP, blue = nuclear  
501 Hoechst stain). 20-40 parasites were examined for each treatment condition on each given day for  
502 duplicate experiments, and data were plotted as the average percentage of parasites in each  
503 population that displayed an elongated, punctate, or dispersed apicoplast GFP signal. For clarity,  
504 error bars are not displayed but standard deviations were <10% in all conditions. Cell-percentage  
505 differences were analyzed by unpaired t-test (P values in parentheses, ns = not significant).

506  
507  
508  
509  
510  
511  
512  
513  
514  
515  
516  
517  
518  
519  
520  
521  
522  
523  
524  
525  
526

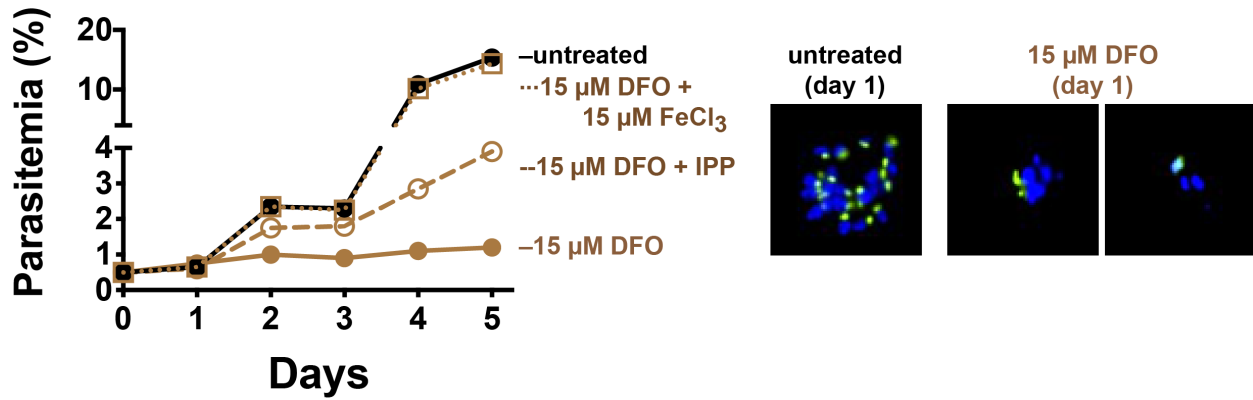

527  
528 **Figure 3- figure supplement 3.** Effect of deferoxamine on parasite growth and apicoplast  
529 biogenesis. (Left) Continuous growth assay of synchronized Dd2 parasites cultured without or  
530 with 15 μM deferoxamine (DFO), 15 μM FeCl<sub>3</sub>, or 200 μM IPP. (Right) Fluorescence microscopy  
531 of live, synchronized D10 parasites untreated or treated with 15 μM DFO and imaged 36 hours  
532 later (green = ACP<sub>L</sub>-GFP, blue = nuclear Hoechst stain).
